# Supplementary material for: Band structure engineering of a polyimide photocatalyst towards enhanced water splitting
Source: Royal Society of Chemistry journal article supplement (doi:10.1039/d3ya00038a), 2023-01-01
Supplement: d3ya00038a1.pdf [file d3ya00038a1.pdf]

## Supporting Information

### **Band structure engineering of polyimide photocatalyst towards enhanced water splitting**

Sheng Chu,<sup>a,b,c</sup> Xintie Wang,<sup>a</sup> Liu Yang,<sup>a</sup> Huiyan Zhang,<sup>↑a</sup> Rui Xiao,<sup>a</sup> Ying Wang<sup>↑b,c</sup> and Zhigang Zou<sup>c</sup>

*<sup>a</sup>Key Laboratory of Energy Thermal Conversion and Control of Ministry of Education, School of Energy and Environment, Southeast University, Nanjing 210096, PR China*

*<sup>b</sup>School of Chemistry and Chemical Engineering, Nanjing University, Nanjing 210023, PR China*

*<sup>c</sup>Eco-materials and Renewable Energy Research Center (ERERC), National Laboratory of Solid State Microstructures, Kunshan Innovation Institute of Nanjing University, Jiangsu Key Laboratory for Nanotechnology, Nanjing University, Nanjing 210023, PR China*

*\*Corresponding authors E-mail: [hyzhang@seu.edu.cn](mailto:hyzhang@seu.edu.cn), [wangy@nju.edu.cn](mailto:wangy@nju.edu.cn)*

**Table S1.** Physicochemical properties and photocatalytic H<sub>2</sub> and O<sub>2</sub> evolution rate of AM-PI and AD-PI with visible light irradiation.

| Sample | Surface area<br>(m <sup>2</sup> /g) | Gas evolution rate<br>( $\mu\text{mol/h}$ ) |                | Specific activity of gas evolution rate<br>( $\mu\text{mol}\cdot\text{g}/(\text{m}^2\cdot\text{h})$ ) |                |
|--------|-------------------------------------|---------------------------------------------|----------------|-------------------------------------------------------------------------------------------------------|----------------|
|        |                                     | H <sub>2</sub>                              | O <sub>2</sub> | H <sub>2</sub>                                                                                        | O <sub>2</sub> |
| AM-PI  | 5.1                                 | 15.2                                        | 0.4            | 3.0                                                                                                   | 0.08           |
| AD-PI  | 1.9                                 | 4.0                                         | 0.7            | 2.1                                                                                                   | 0.37           |

**Table S2.** Performance comparison of PI with other reported PIs and g-C<sub>3</sub>N<sub>4</sub> for photocatalytic hydrogen evolution and oxygen evolution.

| Photocatalyst                   | Sample preparation condition | Hydrogen evolution rate (μmol/h) | Oxygen evolution rate (μmol/h) | Reference |
|---------------------------------|------------------------------|----------------------------------|--------------------------------|-----------|
| AM-PI                           | MA:PMDA=1:1, 325 °C          | 15.2                             | 0.4                            | This work |
| AD-PI                           | MA:PMDA=1:2, 325 °C          | 4                                | 0.7                            | This work |
| PI-300                          | MA:PMDA=1:1, 300 °C          | 5.3                              | /                              | 1         |
| PI-350                          | MA:PMDA=1:1, 350 °C          | 9.6                              | /                              | 1         |
| melem                           | MA, 425 °C                   | 1.9                              | /                              | 2         |
| PI-BP                           | melem:BPDA=1:1, 325 °C       | 1.2                              | /                              | 2         |
| PI-NT                           | melem:NTDA=1:1, 325 °C       | 1.3                              | /                              | 2         |
| PI                              | melem:PMDA=1:1, 325 °C       | 20.6                             | 7.7                            | 3         |
| g-C <sub>3</sub> N <sub>4</sub> | MA, 550 °C                   | 7                                | 0.8                            | 3         |

H<sub>2</sub> evolution condition: 10 vol% methanol, 1 wt% Pt-deposited, λ>420 nm.

O<sub>2</sub> evolution condition: 0.01 M AgNO<sub>3</sub>, λ>420 nm.

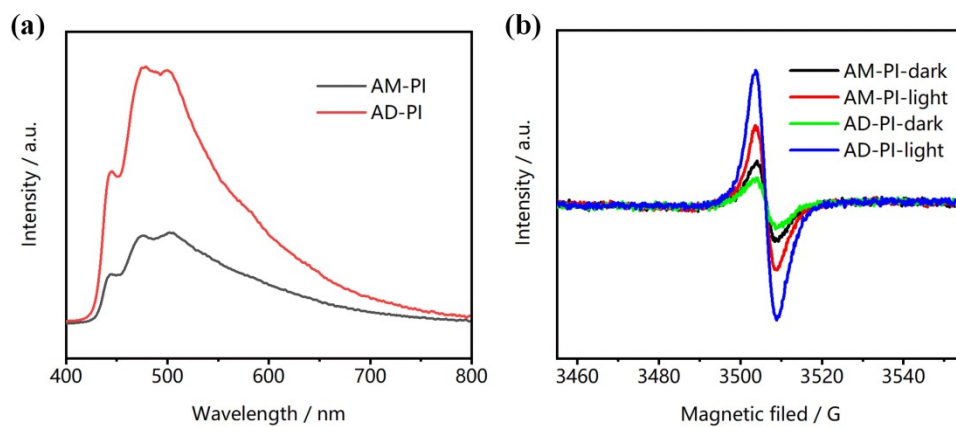

**Figure S1.** (a) PL spectra (excitation at  $\lambda=325$  nm) and (b) ESR spectra in dark and in visible light irradiation ( $\lambda>420$  nm, a 300 W Xe lamp) of AM-PI and AD-PI.

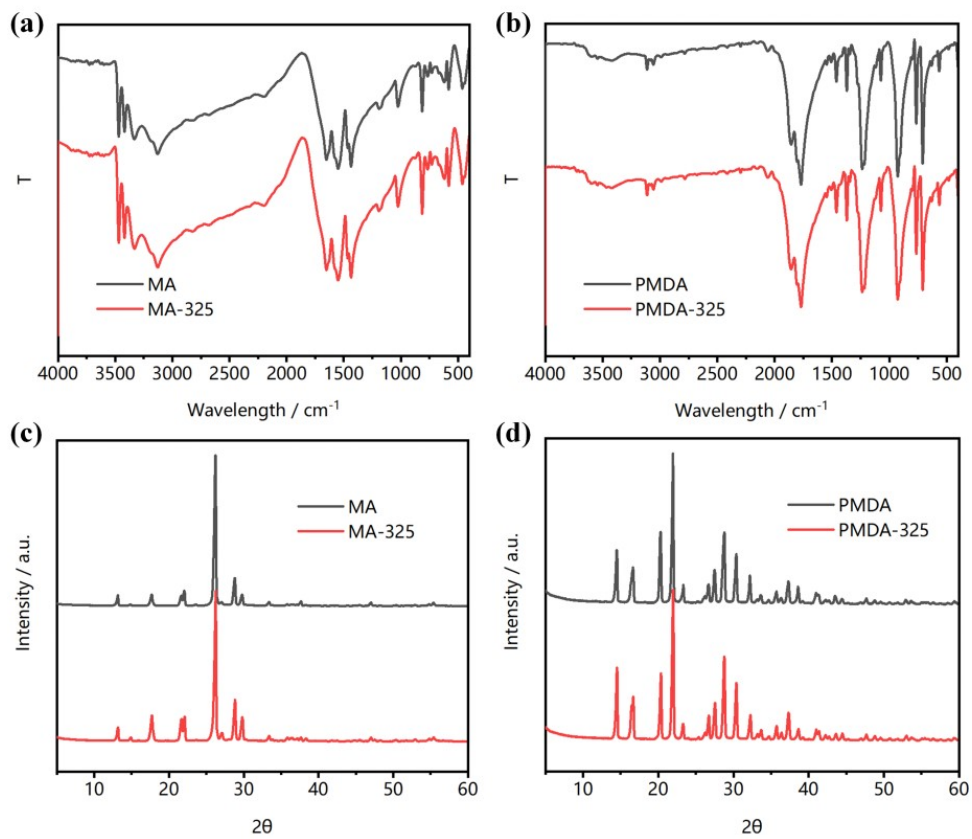

**Figure S2.** FTIR spectra of (a) MA and MA-325, (b) PMDA and PMDA-325, XRD spectra of (c) MA and MA-325, (d) PMDA and PMDA-325.

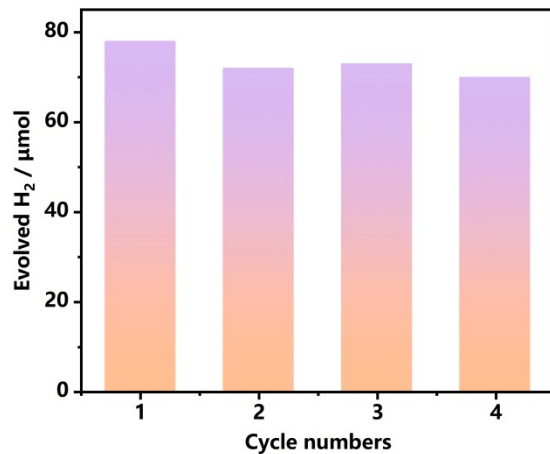

**Figure S3.** Recycle experiments of H<sub>2</sub> evolution from a 10 vol % aqueous methanol solution by 1 wt% Pt-deposited AM-PI, Reaction conditions: 100 mg of AM-PI, visible light irradiation ( $\lambda > 420$  nm), 5 h.

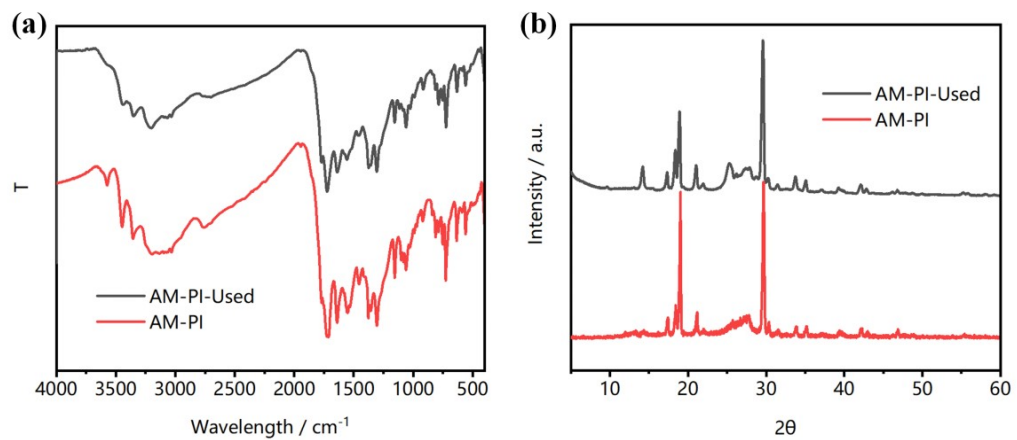

**Figure S4.** (a) FTIR and (b) XRD spectra of AM-PI before and after hydrogen evolution cycle experiments.

## References

- 1 S. Chu, Y. Wang, Y. Guo, P. Zhou, H. Yu, L. Luo, F. Kong, Z. Zou, Facile green synthesis of crystalline polyimide photocatalyst for hydrogen generation from water, *J. Mater. Chem.*, 2012, **22**, 15519.
- 2 S. Chu, Y. Wang, C. Wang, J. Yang, Z. Zou, Bandgap modulation of polyimide photocatalyst for optimum H<sub>2</sub> production activity under visible light irradiation, *Int. J. Hydrogen Energy*, 2013, **38**, 10768-10772.
- 3 S. Chu, Y. Wang, Y. Guo, J. Feng, C. Wang, W. Luo, X. Fan, Z. Zou, Band structure engineering of carbon nitride: In search of a polymer photocatalyst with high photooxidation property, *ACS Catal.*, 2013, **3**, 912-919.
